# Supplementary material for: Clinical Features of Obstructive Sleep Apnea That Determine Its High Prevalence in Resistant Hypertension
Source: PubMed Central journal article supplement — Yonsei Med J. 2015 Jul 29;56(5):1258–65. doi: 10.3349/ymj.2015.56.5.1258 (PMC4541655; doi:10.3349/ymj.2015.56.5.1258), 2015-07-29
Supplement: ymj-56-1258-s001.pdf [file ymj-56-1258-s001.pdf]

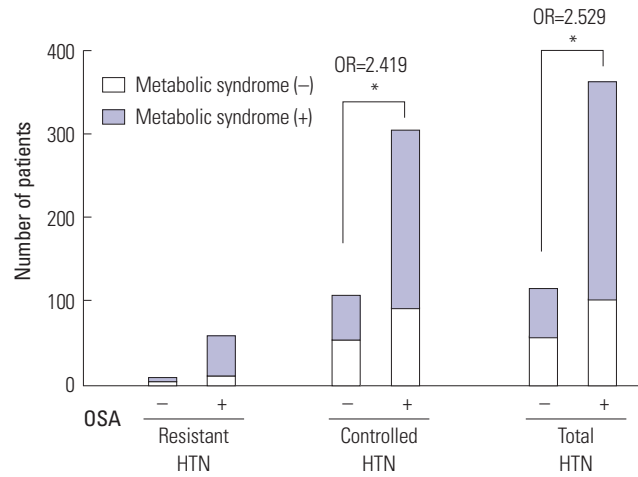

**Supplementary Fig. 1.** The relationship between OSA and metabolic syndrome in patients with controlled or resistant HTN. The number of patients with or without metabolic syndrome was compared among patients with resistant, controlled, and total hypertension. Each odds ratio (OR) was calculated. Metabolic syndrome was significantly associated with OSA in the controlled and total hypertensive groups ( $*p < 0.01$ ). OSA, obstructive sleep apnea; HTN, hypertension.
